# Supplementary material for: Charge storage mechanisms of electrospun Mn3O4 nanofibres for high-performance supercapacitors
Source: Royal Society of Chemistry journal article supplement (doi:10.1039/c6ra28499j), 2017-01-01
Supplement: c6ra28499j1.pdf [file c6ra28499j1.pdf]

## Electronic Supplementary Information

### Change Storage Mechanisms of Electrospun Mn<sub>3</sub>O<sub>4</sub> Nanofibres for High-performance Supercapacitors

Phansiri Suktha<sup>a,b</sup>, Nutthaphon Phattharasupakun<sup>a</sup>, Peerapan Dittanet<sup>b</sup> and Montree Sawangphruk<sup>a,\*</sup>

<sup>a</sup>Department of Chemical and Biomolecular Engineering, School of Energy Science and Engineering, Vidyasirimedhi Institute of Science and Technology, Rayong 21210, Thailand

<sup>b</sup>The Center of Excellence on Petrochemical and Materials Technology, Department of Chemical Engineering, Faculty of Engineering and NANOTEC Center for Nanoscale Materials Design for Green Nanotechnology and Center for Advanced Studies in Nanotechnology and its Applications in Chemical, Food and Agricultural Industries, Kasetsart University, Thailand.

\* Corresponding author. Tel: 66(0)33-01-4251. Fax: 66(0)33-01-4445. E-mail address: montree.s@vistec.ac.th (M. Sawangphruk).

#### 1. Calculations

##### 1.1 Half-cell electrodes

The specific and areal capacitances of MnO<sub>x</sub> half-cell electrodes can be calculated using equations (S1) and (S2)<sup>1</sup>;

$$C_{\text{sp}}(\text{F/g}) = \frac{I \times \Delta t}{\Delta V \times m} \quad (\text{S1})$$

$$C_{\text{Areal}}(\text{mF/cm}^2) = \frac{I \times \Delta t}{\Delta V \times S} \quad (\text{S2})$$

where  $C_{sp}$  is the specific capacitance (F/g),  $C_{Areal}$  is the areal capacitance (F/cm<sup>2</sup>),  $I$  is current,  $\Delta t$  is the discharging time,  $\Delta V$  is the potential window,  $m$  is the mass of active material, and  $S$  is a geometrical area of electrode.

## 1.2 Full-cell supercapacitors

The specific capacitance of the Mn<sub>3</sub>O<sub>4</sub> electrode can be calculated from the specific capacitance of the supercapacitor device by the equation (S3);

$$C_{sp, CV} = 4 \frac{Q}{\Delta V \cdot m} \quad (S3)$$

where  $C_{sp, CV}$  is a specific capacitance determined from CV (F g<sup>-1</sup>),  $Q$  is an average charge in the discharged process (Coulomb, C) of the device, and  $m$  is the total mass of active material (g) of the device.

The specific and areal capacitances as a function of applied currents can be calculated from equations (S4) and (S5), respectively<sup>2</sup>;

$$C_{sp}(F/g) = 4 \frac{I \times \Delta t}{\Delta V \times m} \quad (S4)$$

$$C_{Areal}(mF/cm^2) = 4 \frac{I \times \Delta t}{\Delta V \times S} \quad (S5)$$

The specific energy and maximum specific power can be calculated by the equations (S6) and (S7) from the GCD measurement<sup>1</sup>.

$$\text{Specific Energy (E)} = \frac{1}{2} C_{cell} \Delta V^2 \quad (S6)$$

$$\text{Maximum Specific Power (P}_{max}) = \frac{V_0^2}{4R_{cell}} \quad (S7)$$

where  $C_{\text{cell}}$  is the cell capacitance,  $V_0$  is an initial voltage of the cell, and  $R_{\text{cell}}$  is the cell's resistance.

### 1.3 X-ray absorption spectroscopy

The average oxidation numbers of Mn at the positive and negative electrodes calculated by following equation (S8)<sup>3</sup> are 2.61 and 2.38, respectively.

$$\langle \text{Mn oxidation state} \rangle = \frac{3x\Delta E \text{ of the sample}}{\Delta E \text{ of Mn}^{2+} \text{ and Mn}^{3+}} - \left[ 2x \left( 1 - \frac{\Delta E \text{ of the sample}}{\Delta E \text{ of Mn}^{2+} \text{ and Mn}^{3+}} \right) \right] \quad (\text{S8})$$

### 1.4 EQCM

The relationship of quartz resonance frequency ( $\Delta f$ ) and mass change ( $\Delta m$ ) follows Sauerbrey's equation (S9)<sup>4</sup>;

$$\Delta m = - C_f \cdot \Delta F \quad (\text{S9})$$

where  $C_f$  is the calibration constant ( $0.0815 \text{ Hz ng}^{-1} \text{ cm}^{-2}$ )

## 2. XRD

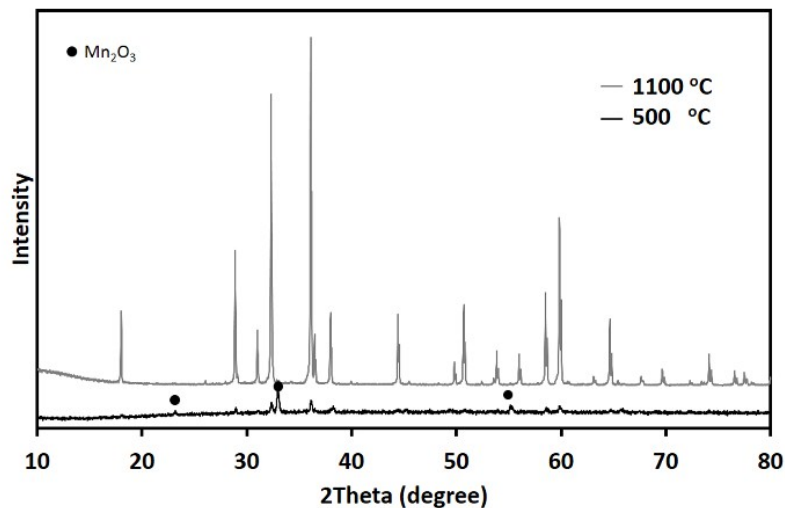

Fig.S1 XRD of MnOx electrospun at 36 wt.% Mn(OAc)<sub>2</sub> in PAN after calcined at 500 °C and 1100 °C.

### 3. XAS calibration curve

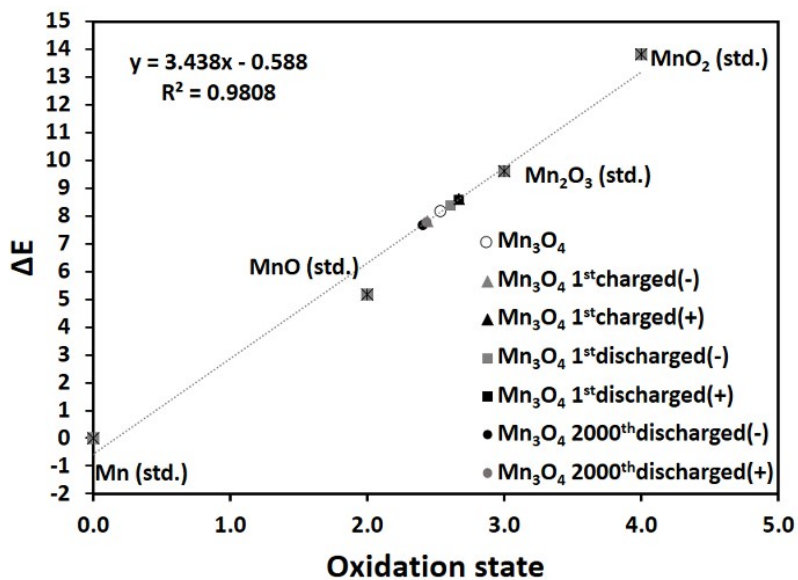

Fig.S2 *Ex situ* high-resolution XAS calibration curve of the manganese oxide compared with the Mn standard compounds including Mn foil, MnO, Mn<sub>2</sub>O<sub>3</sub>, and Mn<sub>3</sub>O<sub>4</sub>.

### 4. Mass ratio by CV

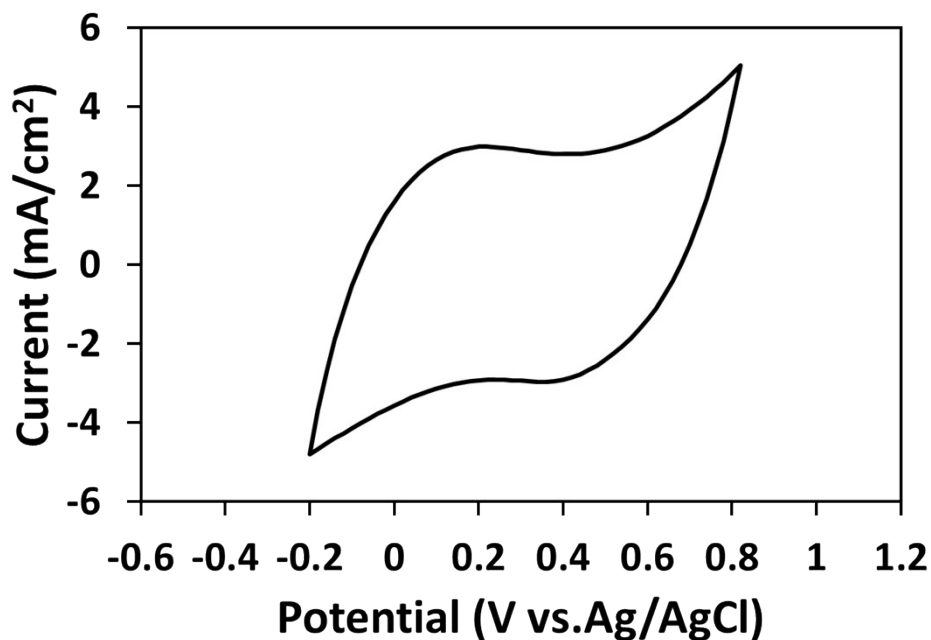

Fig. S3 CV curve of  $\text{Mn}_3\text{O}_4$  nanofibres in 0.5 M  $\text{Na}_2\text{SO}_4$  at a scan rate of  $50 \text{ mV s}^{-1}$

**Positive electrode** ( $\text{Mn}_3\text{O}_4$  nanofibers).

$$C^+ = 68.65 \text{ F/g}$$

$$V^+ = 0.76 \text{ V}$$

**Negative electrode** (N-rGO aerogel)

CV curves of N-rGO aerogel were previously reported by our group elsewhere <sup>5</sup>.

$$C^- = 294.95 \text{ F/g}$$

$$V^- = 0.54 \text{ V}$$

$$\frac{m^+}{m^-} = \frac{(294.95)(0.54)}{(68.65)(0.76)} = 3.04$$

**Table S1.** *Ex situ* high-resolution XAS results of the manganese oxide including  $\text{MnO}$ ,  $\text{Mn}_2\text{O}_3$ , and  $\text{Mn}_3\text{O}_4$

| Sample                                                       | E(eV)   | $\Delta E$ (eV) | Oxidation number |
|--------------------------------------------------------------|---------|-----------------|------------------|
| MnO std.                                                     | 6544.17 | 0               | 2                |
| Mn <sub>2</sub> O <sub>3</sub> std.                          | 6548.61 | 4.44            | 3                |
| Bare Mn <sub>3</sub> O <sub>4</sub>                          | 6547.15 | 2.98            | 2.67             |
| Mn <sub>3</sub> O <sub>4</sub> 1 <sup>st</sup> charge (-)    | 6546.80 | 2.63            | 2.35             |
| Mn <sub>3</sub> O <sub>4</sub> 1 <sup>st</sup> charge (+)    | 6547.60 | 3.43            | 2.61             |
| Mn <sub>3</sub> O <sub>4</sub> 1 <sup>st</sup> discharge (-) | 6547.39 | 3.22            | 2.53             |
| Mn <sub>3</sub> O <sub>4</sub> 1 <sup>st</sup> discharge (+) | 6547.58 | 3.41            | 2.51             |
| Mn <sub>3</sub> O <sub>4</sub> 2000 <sup>th</sup> charge (-) | 6546.69 | 2.52            | 2.38             |
| Mn <sub>3</sub> O <sub>4</sub> 2000 <sup>th</sup> charge (+) | 6546.77 | 2.60            | 2.44             |

## REFERENCES

1. P. Suktha, P. Chiochan, P. Iamprasertkun, J. Wutthiprom, N. Phattharasupakun, M. Suksomboon, T. Kaewsongpol, P. Sirisinudomkit, T. Pettong and M. Sawangphruk, *Electrochim. Acta*, 2015, **176**, 504-513.
2. J. Cao, Y. Wang, Y. Zhou, D. Jia, J.-H. Ouyang and L. Guo, *J. Electroanal. Chem.*, 2012, **682**, 23-28.
3. S. Daengsakul, P. Kidkhunthod, O. Soisang, T. Kuenoon, A. Bootchanont and S. Maensiri, *Microelectron. Eng.*, 2015, **146**, 38-42.
4. W.-Y. Tsai, P.-L. Taberna and P. Simon, *J. Am. Chem. Soc.*, 2014, **136**, 8722-8728.
5. P. Iamprasertkun, A. Krittayavathananon and M. Sawangphruk, *Carbon*, 2016, **102**, 455-461.
